# Supplementary material for: Pupillary light reflex to light inside the natural blind spot
Source: PubMed Central journal article supplement (PMC4481772; doi:10.1038/srep11862), 2015-06-26
Supplement: srep11862-s1.pdf [file srep11862-s1.pdf]

## Supplementary information

### **Pupillary light reflex to light inside the natural blind spot**

Kentaro Miyamoto<sup>1,2</sup> and Ikuya Murakami<sup>1,3,\*</sup>

1 Department of Life Sciences, The University of Tokyo, Tokyo 153-8902, Japan

2 Department of Physiology, The University of Tokyo School of Medicine, Tokyo 113-0033, Japan

3 Department of Psychology, The University of Tokyo, Tokyo 113-0033, Japan

\*Contact information:

Ikuya Murakami

[ikuya@l.u-tokyo.ac.jp](mailto:ikuya@l.u-tokyo.ac.jp)

**Supplementary Figures**

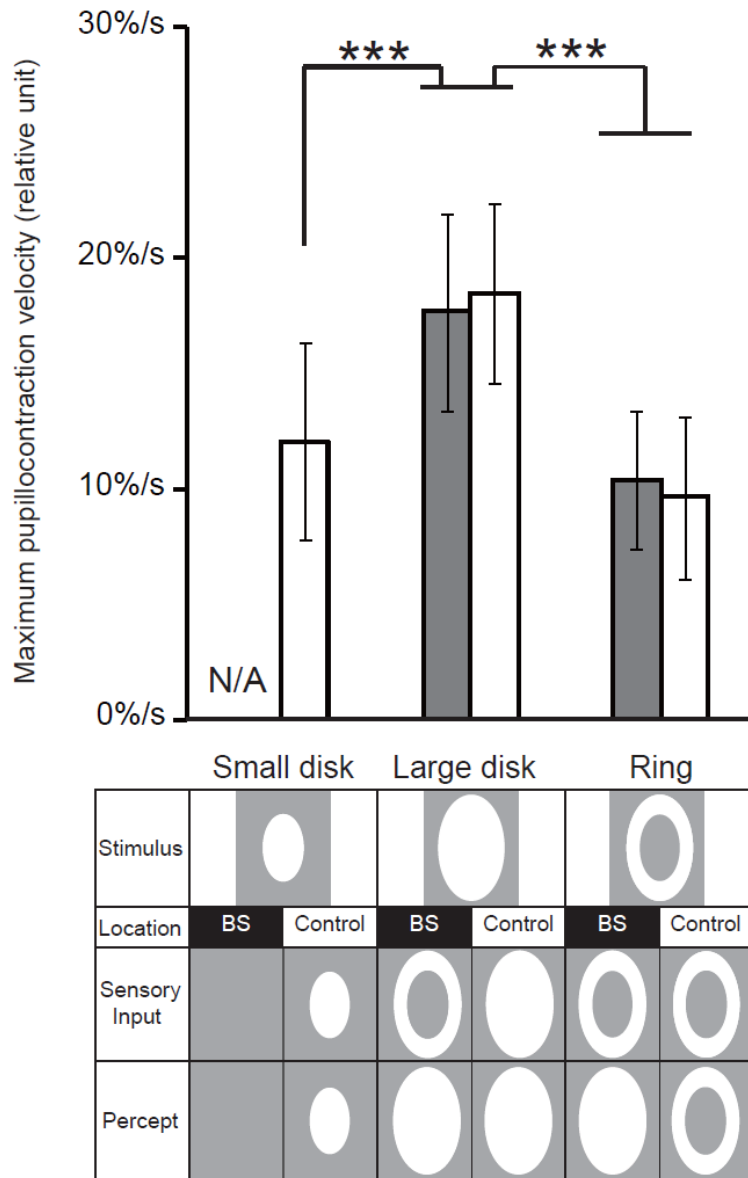

**Supplementary Figure S1. Maximum velocity of pupillary light reflex (PLR) time course in response to white light stimuli with perceptual filling-in.**

Maximum velocity of the PLR time course (mean  $\pm$  1 s.e.m.) across stimulus conditions for white light [N = 10 observers]. \*\*\* p < 0.005 (Bonferroni-corrected).

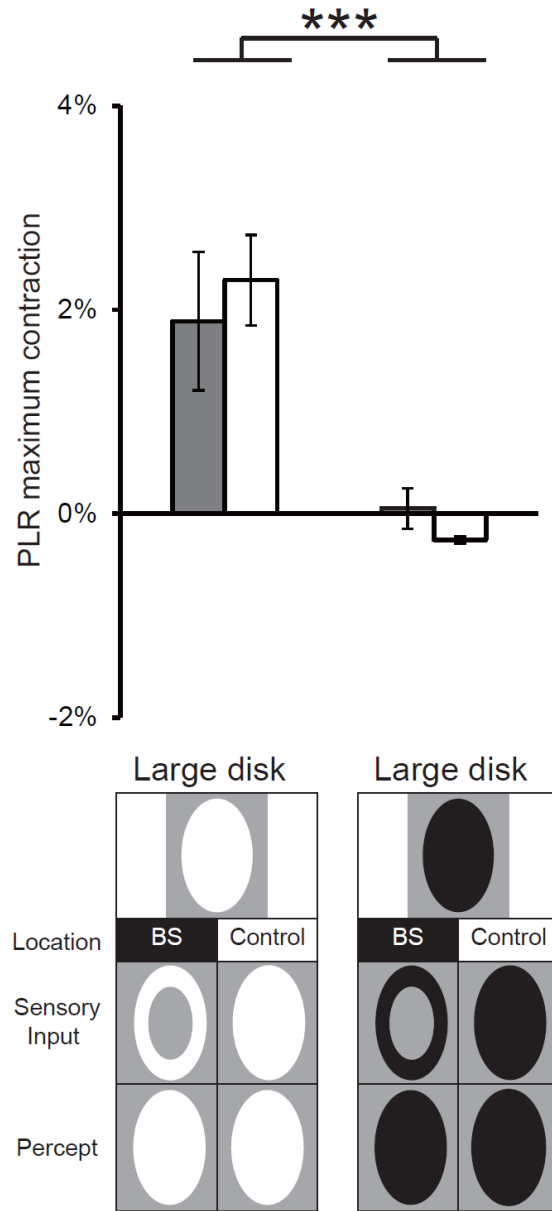

**Supplementary Figure S2. Pupillary light reflex (PLR) in response to spatial pattern changes by presentation of stimuli.**

PLR size (mean  $\pm$  1 s.e.m.) for stimulus presentation with an increment ( $31.0 \text{ cd/m}^2$ ) and decrement ( $0.0 \text{ cd/m}^2$ ) of light intensity from a uniform grey background ( $15.5 \text{ cd/m}^2$ ) [ $N = 3$  observers]. \*\*\*  $p < 0.005$ .

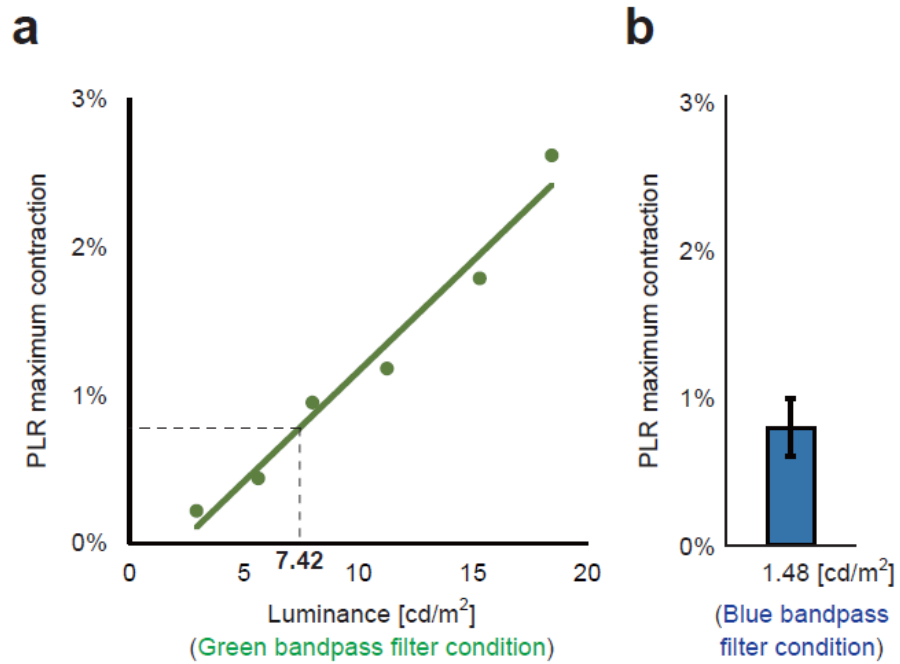

**Supplementary Figure S3. The luminance of green and blue stimuli adjusted to induce comparable pupillary light reflex (PLR) outside the blind spot (BS).**

The luminance of the blue and green stimuli presented inside the BS (see Fig. 5a) was adjusted so that they would induce a comparable PLR if they were presented outside the BS at the same eccentricity. **(a)** green: 7.42 cd/ m<sup>2</sup>. **(b)** blue: 1.48 cd/ m<sup>2</sup>.

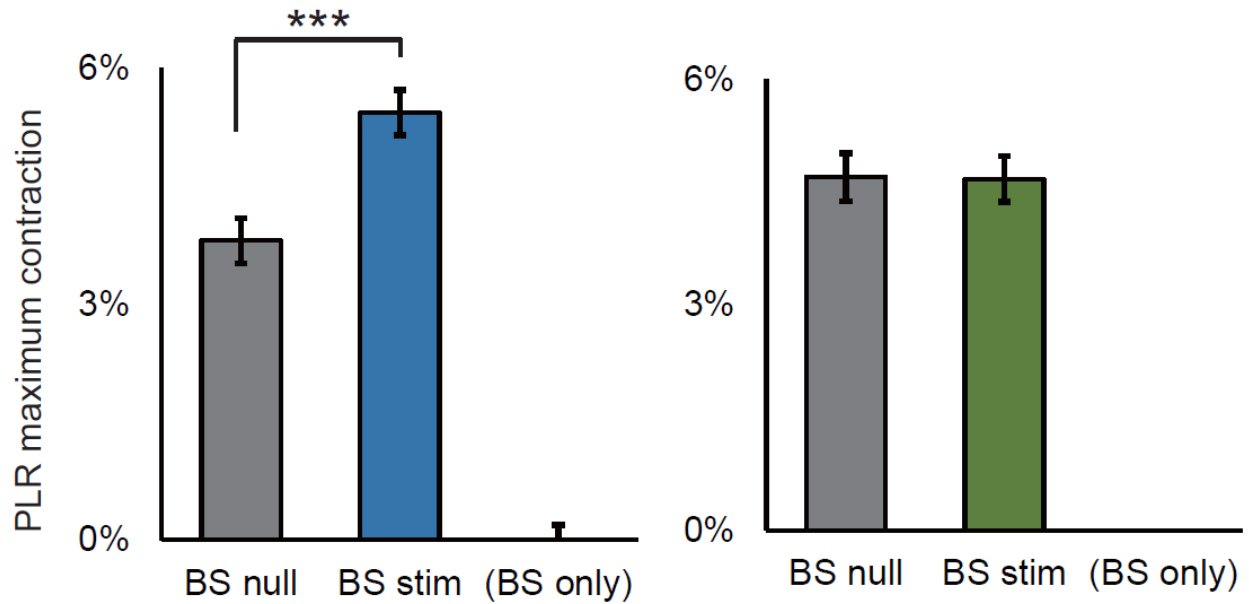

**Supplementary Figure S4. Pupillary light reflex (PLR) in response to light stimulation confined to the region around the centre of the blind spot (BS).**

Results of experiments identical to that illustrated in Fig. 5a, but the small disk was shrunk to 80% of the estimated size of the BS, and the luminance of both the blue and green stimuli was set at 2.96 cd/m<sup>2</sup>. PLR size (mean ± 1 s.e.m.) in each condition in the experiment using the blue disk (left panel) and green disk (right panel). PLR size in “BS only” condition using the green disk:  $-0.71 \pm 0.12$  %. \*\*\*  $p < 0.005$  (Bonferroni-corrected). In both experiments, the PLR sizes in the “BS null” and “BS stim.” conditions were significantly greater than the PLR size in the “BS only” condition ( $p < 10^{-5}$ , Bonferroni-corrected).
